# Supplementary material for: Positive Parenting and Early Childhood Cognition: A Systematic Review and Meta-Analysis of Randomized Controlled Trials
Source: Springer Nature journal article supplement (doi:10.1007/s10567-022-00423-2), 2023-02-02
Supplement: MOESM1 [file 23985964]

**Table 1**

*PsycINFO (OVID) Search Strategy*

---

1. (pre-k\* or prek\* or infan\* or preschool\* or toddler\* or baby\* or babies\* or kindergar\* or (child\* adj6 (young or early))).mp.
  2. Family Intervention/
  3. Parent Training/
  4. Intervention/
  5. Early Intervention/
  6. ((parent\* or mother\* or father\* or maternal\* or paternal\* or caregiver\*) adj6 (random\* or train\* or program\* or preven\* or therap\* or treat\* or coach\* or interve\*)).mp.
  7. 2 or 3 or 4 or 5 or 6
  8. Parenting Skills/
  9. Parenting/
  10. Mother Child Relations/
  11. Parental Characteristics/
  12. exp Parents/
  13. Parent Child Relations/
  14. ((parent\* or mother\* or father\* or maternal\* or paternal\* or caregiv\*) adj6 (proactiv\* or contingen\* or synchron\* or responsiv\* or sensitiv\* or positiv\* or warm\* or affect\* or support\* or involve\*)).mp.
  15. 8 or 9 or 10 or 11 or 12 or 13 or 14
  16. Academic Achievement/
  17. School Readiness/
  18. exp Childhood Development/
  19. exp Cognitive Ability/
  20. exp Cognitive Development/
  21. (Child\* adj6 (develop\* or language or linguis\* or word\* or vocab\* or communicat\* or execut\* or inhibit\* or effortful\* or cognit\* or intellect\* or attention\* or academic\* or numera\* or literacy\* or read\* or spell\* or competenc\*)).mp.
  22. (infan\* adj6 (develop\* or language or linguis\* or word\* or vocab\* or communicat\* or execut\* or inhibit\* or effortful\* or cognit\* or intellect\* or attention\* or academic\* or numera\* or literacy\* or read\* or spell\* or competenc\*)).mp.
  23. 16 or 17 or 18 or 19 or 20 or 21 or 22
  24. 1 and 7 and 15 and 23
  25. limit 24 to (abstract collection or chapter or journal article or publication information)
- 

*Note:* Date of last search: September 21, 2020; Number of hits: 5560

Date of last search: October 16, 2021; Number of hits: 5970

## Table 2

### *MEDLINE (OVID) Search Strategy*

---

1. exp Infant/
  2. exp Child/
  3. (pre-k\* or prek\* or infan\* or preschool\* or toddler\* or baby\* or babies\* or kindergar\* or (child\* adj3 (young or early))).mp.
  4. 1 or 2 or 3
  5. Early Intervention, education/
  6. Randomized controlled trial/
  7. Treatment Outcome/
  8. Psychotherapy/
  9. ((parent\* or mother\* or father\* or maternal\* or paternal\* or caregiver\*) adj3 (random\* or train\* or program\* or preven\* or therap\* or treat\* or coach\* or interve\*)).mp.
  10. 5 or 6 or 7 or 8 or 9
  11. Parenting/
  12. Parents/
  13. exp Parent-child relations/
  14. Maternal behavior/
  15. Paternal behavior/
  16. ((parent\* or mother\* or father\* or maternal\* or paternal\* or caregiv\*) adj3 (proactiv\* or contingen\* or synchron\* or responsiv\* or sensitiv\* or positiv\* or warm\* or affect\* or support\* or involve\*)).mp.
  17. 11 or 13 or 14 or 15 or 16
  18. exp Child Development/
  19. Cognition/
  20. Executive Function/
  21. Learning/
  22. (Child\* adj3 (develop\* or language or linguis\* or word\* or vocab\* or communicat\* or execut\* or inhibit\* or effortful\* or cognit\* or intellect\* or attention\* or academic\* or numera\* or literacy\* or read\* or spell\* or competenc\*)).mp.
  23. (infan\* adj3 (develop\* or language or linguis\* or word\* or vocab\* or communicat\* or execut\* or inhibit\* or effortful\* or cognit\* or intellect\* or attention\* or academic\* or numera\* or literacy\* or read\* or spell\* or competenc\*)).mp.
  24. 18 or 19 or 20 or 21 or 22 or 23
  25. 4 and 10 and 17 and 24
  26. limit 25 to journal article
- 

*Note:* Date of first search: September 23, 2020; Number of hits: 2628

Date of last search: October 16, 2021; Number of hits: 2932

**Table 3**

*ERIC (ProQuest) Search Strategy*

---

MAINSUBJECT.EXACT.EXPLODE("Children") AND  
MAINSUBJECT.EXACT("Psychotherapy") OR MAINSUBJECT.EXACT("Early  
Intervention") OR MAINSUBJECT.EXACT("Randomized Controlled Trials") OR  
MAINSUBJECT.EXACT("Intervention") OR MAINSUBJECT.EXACT("OUTCOMES  
OF TREATMENT") OR noft(((parent\* OR mother\* OR father\* OR maternal\* OR  
paternal\* OR caregiver\*) NEAR/3 (random\* OR train\* OR program\* OR preven\* OR  
therap\* OR treat\* OR coach\* OR interve\*))) AND (MAINSUBJECT.EXACT("Parenting  
Styles") OR MAINSUBJECT.EXACT("Parenting Skills") OR  
MAINSUBJECT.EXACT("Child Rearing") OR MAINSUBJECT.EXACT("Parent Child  
Relationship")) OR noft(((parent\* OR mother\* OR father\* OR maternal\* OR paternal\*  
OR caregiv\*) NEAR/3 (proactiv\* OR contingen\* OR synchron\* OR responsiv\* OR  
sensitiv\* OR positiv\* OR warm\* OR affect\* OR support\* OR involve\*))) AND  
(MAINSUBJECT.EXACT("Learning") OR MAINSUBJECT.EXACT("Executive  
Function") OR MAINSUBJECT.EXACT("Cognitive Processes") OR  
MAINSUBJECT.EXACT.EXPLODE("Child Development") OR  
MAINSUBJECT.EXACT("School Readiness") OR MAINSUBJECT.EXACT("Academic  
Achievement") OR MAINSUBJECT.EXACT.EXPLODE("Cognitive Ability") OR  
MAINSUBJECT.EXACT.EXPLODE("Cognitive Development")) OR (noft(Child\*  
NEAR/3 (develop\* OR language OR linguis\* OR word\* OR vocab\* OR communicat\*  
OR execut\* OR inhibit\* OR effortful\* OR cognit\* OR intellect\* OR attention\* OR  
academic\* OR numera\* OR literacy\* OR read\* OR spell\* OR competenc\*)) OR  
noft(infan\* NEAR/3 (develop\* OR language OR linguis\* OR word\* OR vocab\* OR  
communicat\* OR execut\* OR inhibit\* OR effortful\* OR cognit\* OR intellect\* OR  
attention\* OR academic\* OR numera\* OR literacy\* OR read\* OR spell\* OR  
competenc\*))) AND stype.exact("Scholarly Journals" OR "Reports" OR "Books" OR  
"Speeches & Presentations" OR "Conference Papers & Proceedings")

---

*Note:* Date of last search: September 23, 2020; Number of hits: 1710

Date of last search: October 16, 2021; Number of hits: 1903

#### Table 4

##### Dissertations & Theses Global (ProQuest)

---

noft(((parent\* OR mother\* OR father\* OR maternal\* OR paternal\* OR caregiver\* OR famil\*) NEAR/3 (random\* OR train\* OR program\* OR preven\* OR therap\* OR treat\* OR coach\* OR interve\*))) AND noft(((parent\* OR mother\* OR father\* OR maternal\* OR paternal\* OR caregiv\*) NEAR/3 (relations\* OR behav\* OR proactiv\* OR contingen\* OR synchron\* OR responsiv\* OR sensitiv\* OR positiv\* OR warm\* OR affect\* OR support\* OR involve\*))) AND noft(Child\* NEAR/3 (develop\* OR language OR linguis\* OR word\* OR vocab\* OR communicat\* OR execut\* OR inhibit\* OR effortful\* OR cognit\* OR intellect\* OR attention\* OR academic\* OR numera\* OR literacy\* OR read\* OR spell\* OR competenc\* OR learn\* OR IQ)) OR noft(infan\* NEAR/3 (develop\* OR language OR linguis\* OR word\* OR vocab\* OR communicat\* OR execut\* OR inhibit\* OR effortful\* OR cognit\* OR intellect\* OR attention\* OR academic\* OR numera\* OR literacy\* OR read\* OR spell\* OR competenc\* OR learn\* OR IQ)) AND la.exact("ENG")

---

*Note:* Date of last search: September 23, 2020; Number of hits: 2277

Date of last search: October 16, 2021; Number of hits: 2424
